# Supplementary material
Source: ML conference proceedings conference paper supplement (https://proceedings.neurips.cc/paper_files/paper/2009/hash/d7322ed717dedf1eb4e6e52a37ea7bcd-Abstract.html)
Supplement: Supplementary file [file d7322ed717dedf1eb4e6e52a37ea7bcd-Supplemental.zip]

# A Smoothed Approximate Linear Program: Technical Appendix

## 1 Proof of Theorem 1

**Lemma 1.** For any  $r \in \mathbb{R}^K$  and  $\theta \geq 0$ :

- (i)  $\ell(r, \theta)$  is a bounded, decreasing, piecewise linear, convex function of  $\theta$ .
- (ii)  $\ell(r, \theta) \leq (1 + \alpha)\|J^* - \Phi r\|_\infty$ .
- (iii)  $\frac{\partial}{\partial r} \ell(r, 0) = -\frac{1}{\sum_{x \in \Omega(r)} \pi_{\mu^*, \nu}(x)}$ , where  $\Omega(r) = \operatorname{argmax}_{x \in \mathcal{X}} \Phi r(x) - T\Phi r(x)$ .

**Proof.** (i) Given any  $r$ , clearly  $\gamma = \|\Phi r - T\Phi r\|_\infty$ ,  $s = 0$  is feasible for (5) so that  $\ell(r, \theta)$  is bounded from below. To see that the LP is bounded, suppose  $(s, \gamma)$  is feasible. Then, for any  $x \in \mathcal{X}$ ,

$$\gamma \geq \Phi r(x) - T\Phi r(x) - s(x) \geq \Phi r(x) - T\Phi r(x) - \theta/\pi_{\mu^*, \nu}(x).$$

Thus, the LP is bounded implying that  $\ell(r, \theta)$  is bounded from above.

(ii) Let  $\epsilon = \|J^* - \Phi r\|_\infty$ . Then,

$$\|T\Phi r - \Phi r\|_\infty \leq \|J^* - T\Phi r\|_\infty + \|J^* - \Phi r\|_\infty \leq \alpha\|J^* - \Phi r\|_\infty + \epsilon = (1 + \alpha)\epsilon.$$

Since  $\gamma = \|T\Phi r - \Phi r\|_\infty$ ,  $s = 0$  is feasible for (5), it follows that  $\ell(r, \theta) \leq (1 + \alpha)\|J^* - \Phi r\|_\infty$ .

(iii) This claim follows immediately from standard LP sensitivity analysis; we note that  $\Omega(r)$  is precisely the set of states whose constraints are binding at  $\theta = 0$ . ■

**Lemma 2.** Let  $(r, s)$  be feasible for the LP (4). Then,

$$\Phi r - \Delta^* s \leq J^*,$$

where

$$\Delta^* \triangleq \sum_{k=0}^{\infty} (\alpha P_{\mu^*})^k = (I - \alpha P_{\mu^*})^{-1},$$

and  $P_{\mu^*}$  is the transition probability matrix corresponding to the optimal policy.

**Proof.** Note that

$$\Phi r \leq T_{\mu^*} \Phi r + s,$$

where  $T_{\mu^*}$  is the Bellman operator corresponding to the optimal policy. Repeatedly applying  $T_{\mu^*}$  and using the fact that  $T_{\mu^*}^k \Phi r \rightarrow J^*$ , we obtain

$$\Phi r \leq J^* + \sum_{k=0}^{\infty} (\alpha P_{\mu^*})^k s = J^* + \Delta^* s.$$

■

**Theorem 1.** Let  $\mathbf{1}$  be in the span of  $\Phi$  and  $\nu$  be a probability distribution. Let  $\bar{r}$  be an optimal solution to the SALP (4). Moreover, let  $r^*$  satisfy  $r^* \in \operatorname{argmin}_r \|J^* - \Phi r\|_\infty$ . Then,

$$\|J^* - \Phi \bar{r}\|_{1, \nu} \leq \|J^* - \Phi r^*\|_\infty + \frac{l(r^*, \theta) + 2\theta}{1 - \alpha}.$$

**Proof.** First, define the weight vector  $\tilde{r} \in \mathbb{R}^K$  by

$$\Phi \tilde{r} = \Phi r^* - \frac{\ell(r^*, \theta)}{1 - \alpha} \mathbf{1},$$

and set  $\tilde{s} = s(r^*, \theta)$ , the  $s$ -component of the solution to the LP (5) with parameters  $r^*$  and  $\theta$ . We will demonstrate that  $(\tilde{r}, \tilde{s})$  is feasible for (3). Observe that, by the definition of the LP (5),

$$\Phi r^* \leq T\Phi r^* + \tilde{s} + \ell(r^*, \theta)\mathbf{1}.$$

Then,

$$\begin{aligned} T\Phi \tilde{r} &= T\Phi r^* - \frac{\alpha \ell(r^*, \theta)}{1 - \alpha} \mathbf{1} \\ &\geq \Phi r^* - \tilde{s} - \ell(r^*, \theta)\mathbf{1} - \frac{\alpha \ell(r^*, \theta)}{1 - \alpha} \mathbf{1} \\ &= \Phi \tilde{r} + \frac{\ell(r^*, \theta)}{1 - \alpha} - \tilde{s} - \ell(r^*, \theta)\mathbf{1} - \frac{\alpha \ell(r^*, \theta)}{1 - \alpha} \mathbf{1} \\ &= \Phi \tilde{r} - \tilde{s}. \end{aligned}$$

Now, by Lemma 2,

$$\begin{aligned} \|J^* - \Phi \tilde{r}\|_{1, \nu} &\leq \|J^* - \Phi \tilde{r} + \Delta^* \tilde{s}\|_{1, \nu} + \|\Delta^* \tilde{s}\|_{1, \nu} \\ &= \nu^\top (J^* - \Phi \tilde{r} + \Delta^* \tilde{s}) + \nu^\top \Delta^* \tilde{s} \\ &= \nu^\top (J^* - \Phi \tilde{r}) + \frac{2\pi_{\mu^*, \nu}^\top \tilde{s}}{1 - \alpha} \\ &\leq \nu^\top (J^* - \Phi \tilde{r}) + \frac{2\theta}{1 - \alpha} \\ &\leq \nu^\top (J^* - \Phi \tilde{r}) + \frac{2\theta}{1 - \alpha} \\ &\leq \|J^* - \Phi \tilde{r}\|_\infty + \frac{2\theta}{1 - \alpha} \\ &\leq \|J^* - \Phi r^*\|_\infty + \|\Phi r^* - \Phi \tilde{r}\|_\infty + \frac{2\theta}{1 - \alpha} \\ &\leq \|J^* - \Phi r^*\|_\infty + \frac{\ell(r^*, \theta) + 2\theta}{1 - \alpha}, \end{aligned}$$

as desired. ■

## 2 Proof of Theorem 2

**Theorem 2.** Let  $\Psi \triangleq \{y \in \mathbb{R}^{|\mathcal{X}|} : y \geq \mathbf{1}\}$ . For every  $\psi \in \Psi$ , let  $\beta(\psi) = \max_\mu \left\| \frac{P_\mu \psi}{\psi} \right\|_\infty$ . Then, for an optimal solution  $(\tilde{r}, \tilde{s})$  to (6), we have:

$$\|J^* - \Phi \tilde{r}\|_{1, \nu} \leq \inf_{r, \psi \in \Psi} \|J^* - \Phi r\|_{\infty, 1/\psi} \left( \nu^\top \psi + \frac{2(\pi_{\mu^*, \nu}^\top \psi + 1)(\alpha\beta(\psi) + 1)}{1 - \alpha} \right).$$

**Proof.** Let  $r \in \mathbb{R}^K$  be arbitrary. Let  $\epsilon_r(x) = ((\Phi r)(x) - (T\Phi r)(x))^+$  and  $\psi \in \Psi$ . Define  $s_r$  according to  $s_r(x) = \epsilon_r(x)(1 - \frac{1}{\psi(x)})$  and notice that  $0 \leq s_r(x) \leq \epsilon_r(x)$ .

We next make a few observations. First, define  $\tilde{r}_r$  according to  $\Phi \tilde{r}_r = \Phi r - \frac{\|\epsilon_r\|_{\infty, 1/\psi}}{1 - \alpha} \mathbf{1}$ , and observe that by construction,  $(\tilde{r}_r, s_r)$  is feasible for (6). Thus,

$$\|\Phi r - \Phi \tilde{r}_r\|_\infty \leq \frac{\|\epsilon_r\|_{\infty, 1/\psi}}{1 - \alpha} \leq \frac{\|T\Phi r - \Phi r\|_{\infty, 1/\psi}}{1 - \alpha}.$$

Next, observe that

$$\begin{aligned} \pi_{\mu^*, \nu}^\top s_r &= \sum_x \pi_{\mu^*, \nu}(x) \epsilon_r(x) (1 - 1/\psi(x)) \\ &\leq \pi_{\mu^*, \nu}^\top \epsilon_r \\ &\leq (\pi_{\mu^*, \nu}^\top \psi) \|\epsilon_r\|_{\infty, 1/\psi} \\ &\leq (\pi_{\mu^*, \nu}^\top \psi) \|T\Phi r - \Phi r\|_{\infty, 1/\psi} \end{aligned}$$

Finally, observe that,

$$\pi_{\mu^*, \nu}^\top (J^* - \Phi r) \leq (\pi_{\mu^*, \nu}^\top \psi) \|J^* - \Phi r\|_{\infty, 1/\psi}.$$

Now, we have from the last set of inequalities in the proof of Theorem 1 and the above observations:

$$\begin{aligned}
(9) \quad \|J^* - \Phi \bar{r}\|_{1, \nu} &\leq \nu^\top (J^* - \Phi \bar{r}) + \frac{2\pi_{\mu^*, \nu}^\top \bar{s}}{1 - \alpha} \\
&\leq \nu^\top (J^* - \Phi \tilde{r}_r) + \frac{2\pi_{\mu^*, \nu}^\top s_r}{1 - \alpha} \\
&\leq \nu^\top (J^* - \Phi r) + \nu^\top (\Phi r - \Phi \tilde{r}_r) + \frac{2\pi_{\mu^*, \nu}^\top s_r}{1 - \alpha} \\
&\leq \nu^\top (J^* - \Phi r) + \|\Phi r - \Phi \tilde{r}_r\|_\infty + \frac{2\pi_{\mu^*, \nu}^\top s_r}{1 - \alpha} \\
&\leq (\nu^\top \psi) \|J^* - \Phi r\|_{\infty, 1/\psi} + (2\pi_{\mu^*, \nu}^\top \psi + 1) \frac{\|T\Phi r - \Phi r\|_{\infty, 1/\psi}}{1 - \alpha}
\end{aligned}$$

Since our choice of  $r$  and  $\psi$  were arbitrary, we have:

$$\begin{aligned}
(10) \quad \|J^* - \Phi \bar{r}\|_{1, \nu} &\leq \inf_{r, \psi \in \Psi} (\nu^\top \psi) \|J^* - \Phi r\|_{\infty, 1/\psi} + \\
&\quad \frac{\|T\Phi r - \Phi r\|_{\infty, 1/\psi}}{1 - \alpha} + \frac{2(\pi_{\mu^*, \nu}^\top \psi) \|T\Phi r - \Phi r\|_{\infty, 1/\psi}}{1 - \alpha}.
\end{aligned}$$

We now relate the Bellman error on the right hand side in the above bound to the optimal approximation error. Before doing so we recall:

$$|TJ - T\bar{J}| \leq \alpha \max_u P_u |J - \bar{J}|,$$

and derive the following intermediate result,

$$\begin{aligned}
\max_\mu \|P_\mu | \Phi r - J^* \|_{\infty, 1/\psi} &= \max_{\mu, x \in \mathcal{X}} \left( \frac{\sum_{y \in \mathcal{X}} P_\mu(x, y) |(\Phi r)(y) - J^*(y)|}{\psi(x)} \right) \\
&= \max_{\mu, x \in \mathcal{X}} \left( \frac{\sum_{y \in \mathcal{X}} P_\mu(x, y) \psi(y) \frac{|(\Phi r)(y) - J^*(y)|}{\psi(y)}}{\psi(x)} \right) \\
&\leq \max_{\mu, x \in \mathcal{X}} \left( \frac{\sum_{y \in \mathcal{X}} P_\mu(x, y) \psi(y)}{\psi(x)} \right) \|\Phi r - J^*\|_{\infty, 1/\psi} \\
&= \max_\mu \left\| \frac{P_\mu \psi}{\psi} \right\|_\infty \|\Phi r - J^*\|_{\infty, 1/\psi} \\
&= \beta(\psi) \|\Phi r - J^*\|_{\infty, 1/\psi}.
\end{aligned}$$

Now,

$$\begin{aligned}
(11) \quad \|T\Phi r - \Phi r\|_{\infty, 1/\psi} &\leq (\|T\Phi r - J^*\|_{\infty, 1/\psi} + \|J^* - \Phi r\|_{\infty, 1/\psi}) \\
&\leq \left( \alpha \max_\mu \|P_\mu | \Phi r - J^* \|_{\infty, 1/\psi} + \|J^* - \Phi r\|_{\infty, 1/\psi} \right) \\
&\leq (\alpha \beta(\psi) \|\Phi r - J^*\|_{\infty, 1/\psi} + \|J^* - \Phi r\|_{\infty, 1/\psi}) \\
&= \|\Phi r - J^*\|_{\infty, 1/\psi} (\alpha \beta(\psi) + 1).
\end{aligned}$$

Using (10) and (11), we get the result. ■

### 3 Sample Complexity Results: Proof of Theorem 3

Our proof will rely on the following lemma, which provides a Chernoff bound for the *uniform* convergence of a certain class of functions and the proof of this lemma is based on bounding the pseudo-dimension of this class of functions.

**Lemma 3.** *Given a constant  $B > 0$ , define the function  $\zeta: \mathbb{R} \rightarrow [0, B]$  by*

$$\zeta(t) \triangleq \max(\min(t, B), 0).$$

*Consider a pair of random variables  $(Y, Z) \in \mathbb{R}^K \times \mathbb{R}$ . For each  $i = 1, \dots, n$ , let the pair  $(Y^{(i)}, Z^{(i)})$  be an i.i.d. sample drawn according to the distribution of  $(Y, Z)$ . Then, for all  $\epsilon \in (0, B]$ ,*

$$\begin{aligned} \mathbb{P} \left( \sup_{r \in \mathbb{R}^K} \left| \frac{1}{n} \sum_{i=1}^n \zeta(r^\top Y^{(i)} + Z^{(i)}) - \mathbb{E} [\zeta(r^\top Y + Z)] \right| > \epsilon \right) \\ \leq 8 \left( \frac{32eB}{\epsilon} \log \frac{32eB}{\epsilon} \right)^{K+2} \exp \left( -\frac{\epsilon^2 n}{64B^2} \right). \end{aligned}$$

*Moreover, given  $\delta \in (0, 1)$ , if*

$$n \geq \frac{64B^2}{\epsilon^2} \left( 2(K+2) \log \frac{16eB}{\epsilon} + \log \frac{8}{\delta} \right),$$

*then this probability is at most  $\delta$ .*

Before presenting the proof, we present a few definitions and intermediate results. Consider a family  $\mathcal{F}$  of functions from a set  $\mathcal{S}$  to  $\{0, 1\}$ . Define the *Vapnik-Chervonenkis (VC) dimension*  $\dim_{\text{VC}}(\mathcal{F})$  to be the cardinality  $d$  of the largest set  $\{x_1, x_2, \dots, x_d\} \subset \mathcal{S}$  satisfying:

$$\forall e \in \{0, 1\}^d, \exists f \in \mathcal{F} \text{ such that } \forall i, f(x_i) = 1 \text{ iff } e_i = 1.$$

Now, let  $\mathcal{F}$  be some set of *real*-valued functions mapping  $\mathcal{S}$  to  $[0, B]$ . The *pseudo-dimension*  $\dim_P(\mathcal{F})$  is the following generalization of VC dimension: for each function  $f \in \mathcal{F}$  and scalar  $c \in \mathbb{R}$ , define a function  $g: \mathcal{S} \times \mathbb{R} \rightarrow \{0, 1\}$  according to:

$$g(x, c) \triangleq \mathbb{I}_{\{f(x) - c \geq 0\}}.$$

Let  $\mathcal{G}$  denote the set of all such functions. Then, we define  $\dim_P(\mathcal{F}) \triangleq \dim_{\text{VC}}(\mathcal{G})$ .

In order to prove Lemma 3, define the  $\mathcal{F}$  to be the set of functions  $f: \mathbb{R}^K \times \mathbb{R} \rightarrow [0, B]$ , where, for all  $x \in \mathbb{R}^K$  and  $y \in \mathbb{R}$ ,

$$f(y, z) \triangleq \zeta(r^\top y + z).$$

Here,  $\zeta(t) \triangleq \max(\min(t, B), 0)$ , and  $r \in \mathbb{R}^K$  is a vector that parameterizes  $f$ . We will show that  $\dim_P(\mathcal{F}) \leq K + 2$ .

We will use the following standard result from convex geometry:

**Lemma 4** (Radon's Lemma). *A set  $A \subset \mathbb{R}^m$  of  $m + 2$  points can be partitioned into two disjoint sets  $A_1$  and  $A_2$ , such that the convex hulls of  $A_1$  and  $A_2$  intersect.*

**Lemma 5.**  $\dim_P(\mathcal{F}) \leq K + 2$

**Proof.** Assume, for the sake of contradiction, that  $\dim_P(\mathcal{F}) > K + 2$ . It must be that there exists a 'shattered' set

$$\left\{ (y^{(1)}, z^{(1)}, c^{(1)}), (y^{(2)}, z^{(2)}, c^{(2)}), \dots, (y^{(K+3)}, z^{(K+3)}, c^{(K+3)}) \right\} \subset \mathbb{R}^K \times \mathbb{R} \times \mathbb{R},$$

such that, for all  $e \in \{0, 1\}^{K+3}$ , there exists a vector  $r_e \in \mathbb{R}^K$  with

$$\zeta(r_e^\top y^{(i)} + z^{(i)}) \geq c^{(i)} \text{ iff } e_i = 1, \quad \forall 1 \leq i \leq K + 3.$$

Observe that we must have  $c^{(i)} \in (0, B]$  for all  $i$ , since if  $c^{(i)} \leq 0$  or  $c^{(i)} > B$ , then no such shattered set can be demonstrated. But if  $c^{(i)} \in (0, B]$ , for all  $r \in \mathbb{R}^K$ ,

$$\zeta \left( r^\top y^{(i)} + z^{(i)} \right) \geq c^{(i)} \implies r_e^\top y^{(i)} \geq c^{(i)} - z^{(i)},$$

and

$$\zeta \left( r^\top y^{(i)} + z^{(i)} \right) < c^{(i)} \implies r_e^\top y^{(i)} < c^{(i)} - z^{(i)}.$$

For each  $1 \leq i \leq K+3$ , define  $x^{(i)} \in \mathbb{R}^{K+1}$  component-wise according to

$$x_j^{(i)} \triangleq \begin{cases} y_j^{(i)} & \text{if } j < K+1, \\ c^{(i)} - z^{(i)} & \text{if } j = K+1. \end{cases}$$

Let  $A = \{x^{(1)}, x^{(2)}, \dots, x^{(K+3)}\} \subset \mathbb{R}^{K+1}$ , and let  $A_1$  and  $A_2$  be subsets of  $A$  satisfying the conditions of Radon's lemma. Define a vector  $\tilde{e} \in \{0, 1\}^{K+3}$  component-wise according to

$$\tilde{e}_i \triangleq \mathbb{I}_{\{x^{(i)} \in A_1\}}.$$

Define the vector  $\tilde{r} \triangleq r_{\tilde{e}}$ . Then, we have

$$\begin{aligned} \sum_{j=1}^K \tilde{r}_j x_j &\geq x_{K+1}, \quad \forall x \in A_1, \\ \sum_{j=1}^K \tilde{r}_j x_j &< x_{K+1}, \quad \forall x \in A_2. \end{aligned}$$

Now, let  $\bar{x} \in \mathbb{R}^{K+1}$  be a point contained in both the convex hull of  $A_1$  and the convex hull of  $A_2$ . Such a point must exist by Radon's lemma. By virtue of being contained in the convex hull of  $A_1$ , we must have

$$\sum_{j=1}^K \tilde{r}_j \bar{x}_j \geq \bar{x}_{K+1}.$$

Yet, by virtue of being contained in the convex hull of  $A_2$ , we must have

$$\sum_{j=1}^K \tilde{r}_j \bar{x}_j < \bar{x}_{K+1},$$

which is impossible. ■

With the above pseudo-dimension estimate, Lemma 3 follows immediately from Corollary 2 of Haussler [11, Section 4]. Armed with this Lemma, we are ready to prove Theorem 3.

**Proof of Theorem 3.** Define the vectors

$$\hat{s}_{\mu^*} \triangleq (\Phi \hat{r}_{\text{SALP}} - T_{\mu^*} \Phi \hat{r}_{\text{SALP}})^+, \quad \text{and} \quad \hat{s} \triangleq (\Phi \hat{r}_{\text{SALP}} - T \Phi \hat{r}_{\text{SALP}})^+.$$

One has, via Lemma 2, that

$$\Phi \hat{r}_{\text{SALP}} - J^* \leq \Delta^* \hat{s}_{\mu^*}$$

Thus, as in the last set of inequalities in the proof of Theorem 1, we have

$$(12) \quad \|J^* - \Phi \hat{r}_{\text{SALP}}\|_{1,\nu} \leq \nu^\top (J^* - \Phi \hat{r}_{\text{SALP}}) + \frac{2\pi_{\mu^*,\nu}^\top \hat{s}_{\mu^*}}{1-\alpha}.$$

Now, let  $\hat{\pi}_{\mu^*,\nu}$  be the empirical measure induced by the collection of sampled states  $\hat{\mathcal{X}}$ . Given a state  $x \in \mathcal{X}$ , define a vector  $Y(x) \in \mathbb{R}^K$  and a scalar  $Z(x) \in \mathbb{R}$  according to

$$Y(x) \triangleq \Phi(x)^\top - \alpha P_{\mu^*} \Phi(x)^\top, \quad Z(x) \triangleq -g(x, \mu^*(x)),$$

so that, for any vector of weights  $r \in \mathcal{N}$ ,

$$(\Phi r(x) - T_{\mu^*} \Phi r(x))^+ = \zeta(r^\top Y(x) + Z(x)).$$

Then,

$$|\hat{\pi}_{\mu^*, \nu}^\top \hat{s}_{\mu^*} - \pi_{\mu^*, \nu}^\top \hat{s}_{\mu^*}| \leq \sup_{r \in \mathcal{N}} \left| \frac{1}{S} \sum_{x \in \hat{\mathcal{X}}} \zeta(r^\top Y(x) + Z(x)) - \sum_{x \in \mathcal{X}} \pi_{\mu^*, \nu}(x) \zeta(r^\top Y(x) + Z(x)) \right|.$$

Applying Lemma 3, we have that

$$(13) \quad \mathbb{P}(|\hat{\pi}_{\mu^*, \nu}^\top \hat{s}_{\mu^*} - \pi_{\mu^*, \nu}^\top \hat{s}_{\mu^*}| > \epsilon) \leq \delta.$$

Next, suppose  $(r_{\text{SALP}}, \bar{s})$  is an optimal solution to the SALP (6). Then, with probability at least  $1 - \delta$ ,

$$(14) \quad \begin{aligned} \nu^\top (J^* - \Phi \hat{r}_{\text{SALP}}) + \frac{2\pi_{\mu^*, \nu}^\top \hat{s}_{\mu^*}}{1 - \alpha} &\leq \nu^\top (J^* - \Phi \hat{r}_{\text{SALP}}) + \frac{2\hat{\pi}_{\mu^*, \nu}^\top \hat{s}_{\mu^*}}{1 - \alpha} + \frac{2\epsilon}{1 - \alpha} \\ &\leq \nu^\top (J^* - \Phi \hat{r}_{\text{SALP}}) + \frac{2\hat{\pi}_{\mu^*, \nu}^\top \hat{s}}{1 - \alpha} + \frac{2\epsilon}{1 - \alpha} \\ &\leq \nu^\top (J^* - \Phi r_{\text{SALP}}) + \frac{2\hat{\pi}_{\mu^*, \nu}^\top \bar{s}}{1 - \alpha} + \frac{2\epsilon}{1 - \alpha}, \end{aligned}$$

where the first inequality follows from (13), and the final inequality follows from the optimality of  $(\hat{r}_{\text{SALP}}, \hat{s})$  for the sampled SALP (7).

Notice that, without loss of generality, we can assume that  $\bar{s}(x) = (\Phi r_{\text{SALP}}(x) - T\Phi r_{\text{SALP}}(x))^+$ , for each  $x \in \mathcal{X}$ . Thus,  $0 \leq \bar{s}(x) \leq B$ . Applying Hoeffding's inequality,

$$\mathbb{P}(|\hat{\pi}_{\mu^*, \nu}^\top \bar{s} - \pi_{\mu^*, \nu}^\top \bar{s}| \geq \epsilon) \leq 2 \exp\left(-\frac{2S\epsilon^2}{B^2}\right) < 2^{-383}\delta^{128},$$

where final inequality follows from our choice of  $S$ . Combining this with (12) and (14), with probability at least  $1 - \delta - 2^{-383}\delta^{128}$ , we have

$$\begin{aligned} \|J^* - \Phi \hat{r}_{\text{SALP}}\|_{1, \nu} &\leq \nu^\top (J^* - \Phi r_{\text{SALP}}) + \frac{2\hat{\pi}_{\mu^*, \nu}^\top \bar{s}}{1 - \alpha} + \frac{2\epsilon}{1 - \alpha} \\ &\leq \nu^\top (J^* - \Phi r_{\text{SALP}}) + \frac{2\pi_{\mu^*, \nu}^\top \bar{s}}{1 - \alpha} + \frac{4\epsilon}{1 - \alpha}. \end{aligned}$$

The result then follows from (9)–(11) in the proof of Theorem 2. ■
